# Supplementary material for: A novel approach to analyze lysosomal dysfunctions through subcellular proteomics and lipidomics: the case of NPC1 deficiency
Source: PubMed Central journal article supplement (PMC5278418; doi:10.1038/srep41408), 2017-01-30

## **A novel approach to analyze lysosomal dysfunctions through subcellular proteomics and lipidomics: the case of NPC1 deficiency**

Arun Kumar Tharkeshwar<sup>1,2,3</sup>, Jesse Trekker<sup>2,4</sup>, Wendy Vermeire<sup>1</sup>, Jarne Pauwels<sup>3</sup>, Ragna Sannerud<sup>1</sup>, David A. Priestman<sup>5</sup>, Danielle te Vruchte<sup>5</sup>, Katlijn Vints<sup>6</sup>, Pieter Baatsen<sup>6</sup>, Jean-Paul Decuypere<sup>1</sup>, Huiqi Lu<sup>1</sup>, Shaun Martin<sup>7</sup>, Peter Vangheluwe<sup>7</sup>, Johannes V. Swinnen<sup>8</sup>, Liesbet Lagae<sup>2,9</sup>, Francis Impens<sup>3,10</sup>, Frances M. Platt<sup>5</sup>, Kris Gevaert<sup>3</sup>, Wim Annaert<sup>1\*</sup>

<sup>1</sup>Laboratory for Membrane Trafficking, VIB Center for the Biology of Disease, Center for Human Genetics (KU Leuven), Leuven, Belgium

<sup>2</sup>Department of Life Science Technology, imec, Leuven, Belgium

<sup>3</sup>VIB Medical Biotechnology Center & Department of Biochemistry, UGent, Ghent, Belgium

<sup>4</sup>Biomedical MRI, Department of Imaging and Pathology, KU Leuven, Leuven 3000, Belgium

<sup>5</sup>Department of Pharmacology, University of Oxford, Oxford, United Kingdom

<sup>6</sup>Bio-imaging core - Electron Microscopy Facility (EMCORF), VIB Center for the Biology of Disease, Leuven, Belgium

<sup>7</sup>Laboratory of Cellular Transport Systems, Department of Cellular and Molecular Medicine, KU Leuven, Leuven, Belgium

<sup>8</sup>Laboratory of Lipid Metabolism and Cancer, Department of Oncology, KU Leuven, Leuven, Belgium

<sup>9</sup>Department of Physics, Solid State Physics and Magnetism, KU Leuven, Leuven, Belgium

<sup>10</sup>Proteomics Expertise Center, VIB Medical Biotechnology Center, Ghent, Belgium

\* Corresponding author:

Wim Annaert, PhD,

Laboratory for Membrane Trafficking, VIB & KU Leuven

Gasthuisberg, O&N4, Rm. 7.159, Herestraat 49, B-3000 Leuven, Belgium

Tel: +32 16 330520; Email: [wim.annaert@cme.vib-kuleuven.be](mailto:wim.annaert@cme.vib-kuleuven.be)

## Summary of Supplementary material

**Supplementary Figure 1:** Synthesis of monodisperse SPIONs using thermal decomposition followed by surface functionalization.

**Supplementary Figure 2:** Effect of functionalized SPIONs on HeLa cell viability, internalization, endocytic transport and lysosomal function.

**Supplementary Figure 3:** Aminolipid-coated SPIONs accumulate at the cell surface while DMSA-coated SPIONs accumulate in Lamp1 positive organelles across various cell types.

**Supplementary Figure 4:** Fractions isolated using DMSA- and aminolipid-SPIONs are devoid of contaminating organelles.

**Supplementary Figure 5:** Proteomics on isolated subcellular compartments demonstrate enrichments for endosomal and cell surface associated GO-terms.

**Supplementary Figure 6:** KO of NPC1 causes increases in lysosomal volume and pH along with an increased storage of cholesterol and glycosphingolipids.

**Supplementary Figure 7:** Lipids accumulating in LE/LYS of NPC1 KO cells do not show significant changes in their molecular features.

**Supplementary Table S1:** Absolute quantities of lipids identified in PM and LE/LYS fractions isolated from WT and NPC1 KO HeLa cells.

**Supplementary Table S2:** Individual features of the lipid species identified in PM and LE/LYS fractions isolated from WT and NPC1 KO HeLa cells.

**Supplementary Table S3:** List of proteins identified in LE/LYS fraction isolated from WT and NPC1 KO HeLa cells.

**Supplementary Table S4:** List of proteins identified in PM fraction isolated from WT and NPC1 KO HeLa cells.

## Supplementary Figure Legends

**Supplementary Figure 1: Synthesis of monodisperse SPIONs using The thermal decomposition method of SPION synthesis followed by its surface functionalization results in the formation of mono-dispersed particles with superparamagnetic property.** (A) Scheme representing major steps in SPION synthesis. Surface functionalization has no influence on the superparamagnetic behavior (B-G) and size distribution (H-N) of SPIONs. Normalized magnetic hysteresis curves of SPIONs coated with oleic acid - DMSA (B), oleic acid - lipids (C), aminolipids (D), DMSA (E), carboxylipids (F), methoxylipids (G) as measured by vibrating sample magnetometer (VSM). The red curve line represents the Langevin fitting. Histograms of the size distribution of SPIONs coated with oleic acid - DMSA (H), oleic acid - lipids (I), aminolipids (J), DMSA (K), carboxylipids (L), methoxylipids (M) as determined by TEM were fitted with a log normal distribution curve (red). (N) FTIR spectral analysis of functionalized surface coatings. All FTIR-spectra, although less abundant for the DMSA-SPIONs, showed several similar peaks just below  $3000\text{ cm}^{-1}$ . These peaks are characteristic for the asymmetric ( $\nu_{as}$ ) and symmetric ( $\nu_s$ ) stretch of saturated alkane chains ( $\nu_{as}\text{ CH}_3 \sim 2960\text{ cm}^{-1}$ ,  $\nu_{as}\text{ CH}_2 \sim 2925\text{ cm}^{-1}$ ,  $\nu_s\text{ CH}_3 \sim 2890\text{ cm}^{-1}$ ,  $\nu_s\text{ CH}_2 \sim 2855\text{ cm}^{-1}$ ), which are all present in the molecules functionalizing the SPIONs. A joint peak visible around  $\sim 600\text{ cm}^{-1}$  represents the Fe-O stretch of the ferrite core in the SPIONs while the presence of PEG in phospholipids is clearly visible due to the strong peak at  $\sim 1110\text{ cm}^{-1}$  which is derived from the ethylene oxide stretch (C-O-C). Due to the abundance of different FTIR vibrations in the phospholipids it is not possible to distinguish the specific end-groups (O-CH<sub>3</sub>, -COOH, -NH<sub>2</sub>) of different lipids used to functionalize the SPIONs.

**Supplementary Figure 2: Effect of functionalized SPIONs on HeLa cell viability, internalization, endocytic transport and lysosomal function.** (A) Percentage of viable and dead cells after 1 h of incubation with functionalized SPIONs as measured with trypan blue. (B-C) SPIONs functionalized with either carboxylipids/methoxylipids do not interact with HeLa cells at 37°C. TEM images of HeLa cells incubated with carboxylipid- (B) or methoxylipid- (C) coated SPIONs

for 15 min and chased for 4 h. **(D)** XBP1 splicing assay and quantitative western blot analysis **(E-F)** of indicated marker proteins on total extracts of cells incubated with DMSA- and aminolipid-SPIONs for a chase period of 4 and 15 h. As a control, cells were incubated with thapsigargin. **(G)** Percentage of viable and dead (apoptotic) cells after a chase period of 4 h with aminolipid- and DMSA-SPIONs as measured with propidium iodide staining. **(H)** Western blot analysis for indicated marker proteins on total cell extracts of cells incubated with aminolipid- and DMSA-SPIONs for a chase period of 4 and 15 h. As a control, total cell extracts from cells incubated without SPIONs or with Bortezomib were used. **(I)** Cell surface biotinylation on HeLa cells incubated (pulse 15 min, chase 4 h at 37°C) with and without DMSA-SPIONs using EZ-Link Sulfo-NHS-SS-Biotin (Pierce) (10 min at 4 °C). Representative Western blot of biotinylated transferrin receptor (TfR) at indicated internalization time points at 37°C. **(L)** Confocal analysis of Alexa568-labeled transferrin internalized for 20min at 37 °C. Insets show zoomed areas depicting colocalization with endogenous EEA1. **(M)** Quantification of co-localization represented by the Pearson's coefficient. **(J)** DQ-BSA assay measuring lysosomal proteolytic activity in HeLa cells incubated with DMSA-coated SPIONs for 15 min and chased for 4 and 15 h. As a control, total cell extracts from cells were incubated without SPIONs or with bafilomycin A1. Confocal image of LE/LYS isolates stained with LysoTracker-red **(K)**. Ctrl - Control, TG - Thapsigargin, BR - Bortezomib, BAF - bafilomycin A1, Amino - Aminolipid-SPIONs, DMSA - DMSA-SPIONs, Carb - Carboxylipid-SPIONs and Meth - Methoxylipid-SPIONs, NR - Nonreduced, TfR - Transferrin receptor. Scale bar = 20 µm.

**Supplementary Figure 3: Aminolipid-coated SPIONs accumulate at the cell surface while DMSA-coated SPIONs accumulate in Lamp1 positive organelles across various cell types.** Confocal analysis of MEF, HeLa, MF4, RAW and rat primary hippocampal neurons incubated with fluorescently modified DMSA-coated SPIONs (pulse 15 min, chase 4 h, 37°C) **(A)** or with **(B)** aminolipid-coated SPIONs (pulse 15 min, 4°C). Scale bar in **(A)** is 10 µm, **(B)** is 20 µm.

**Supplementary Figure 4: Fractions isolated using DMSA- and aminolipid-SPIONs are devoid of contaminating organelles.** Quantitative western blot analysis of the indicated marker proteins in isolated fractions of DMSA-SPIONs with increasing chase periods of **(A)** 0 min **(B)** 1 h **(C)** 2 h **(D)** 3 h **(E)** 4 h and in isolated fractions of aminolipid-SPIONs **(F)** as a fold increase relative to the total cell lysate (TCL) (mean  $\pm$  SEM, n=3). Rab5 and CatD are early and LE/LYS marker proteins, respectively; p58 is used as a marker for intermediate to cis-Golgi compartments, lamin as a nuclear marker, actin as a cytoskeletal marker and PEX14p is a peroxisomal marker protein.

**Supplementary Figure 5: Proteomics on isolated subcellular compartments demonstrate enrichments for endosomal and cell surface associated GO-terms.** Venn diagram indicating the distribution of unique proteins identified in two replicates using gel-based shotgun proteome analysis of the total cell lysate (TCL) **(A1)** and magnetically isolated fractions using aminolipid-coated **(A2)**, DMSA-coated (chase period of 4 h) SPIONs **(A3)**. Gene Ontology (GO) enrichment analysis of proteins identified in the bound/magnetic fractions isolated using DMSA- (B1, B2), or aminolipid-SPIONs (C1, C2). GO enrichment was performed using DAVID.

**Supplementary Figure 6: KO of NPC1 causes increases in lysosomal volume and pH along with an increased storage of cholesterol and glycosphingolipids.** **(A)** Western blot analysis of the indicated organelle marker proteins in total cell lysates shows complete loss of NPC1 protein expression in the two KO cell lines. Rab5 is used as a marker for early endosomes, Rab7 for late endosomes, Lamp1 for lysosomes, ribophorin, actin and GAPDH represent endoplasmic reticulum, cytoskeleton and cytosol respectively. Relative LE/LYS volume and pH increases in NPC1-KO cells **(B-C)**. Fluorescence of cells stained with LysoTracker-green **(B)** or LysoSensor Yellow/Blue DND-160 **(C)** was measured by flow cytometry and corresponding values are expressed as mean equivalent of fluorescence (MEFL). **(D)** Filipin staining reveals cholesterol accumulation in LAMP1-positive organelles solely in NPC1 KO cells. NPC1-KO cells show relative increase in the storage of sphingosine **(E)** and glycosphingolipid **(F)** as measured by HPLC.

**Supplementary Figure 7: Lipids accumulating in LE/LYS of NPC1 KO cells do not show significant changes in their molecular features.** Enrichment plot for Glycerophospholipid (GPL) and Sphingolipid (SP) chain lengths expressed as number of carbon atoms (**A, D and H, K**), saturation expressed as number of double bonds (**B, E and I, L**) related to the sum of long chain fatty acid moieties, and the number of hydroxylations (**C, F and J, M**) and this for PM and LE/LYS fractions isolated from NPC1 KO cells relative to WT HeLa cells. Features were calculated from individual quantities of lipid molecular species (mean  $\pm$  SEM, n=3).

**Supplementary Table Legends:**

**Supplementary Table S1:** Absolute quantities of lipids identified in PM and LE/LYS fractions isolated from WT and NPC1 KO HeLa cells. Values are expressed in pmol for each lipid species identified in each individual sample, experiment.

**Supplementary Table S2:** Individual features of the lipid species identified in PM and LE/LYS fractions isolated from WT and NPC1 KO HeLa cells. Features are normalized to individual lipid class.

**Supplementary Table S3:** List of proteins identified in LE/LYS fraction isolated from WT and NPC1 KO HeLa cells.

**Supplementary Table S4:** List of proteins identified in PM fraction isolated from WT and NPC1 KO HeLa cells.

A

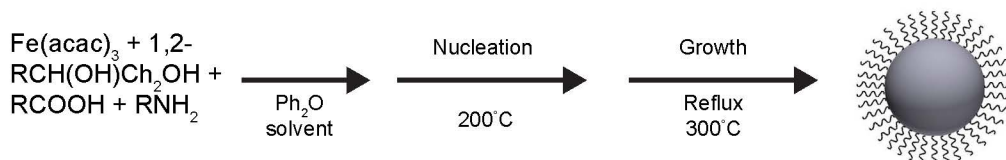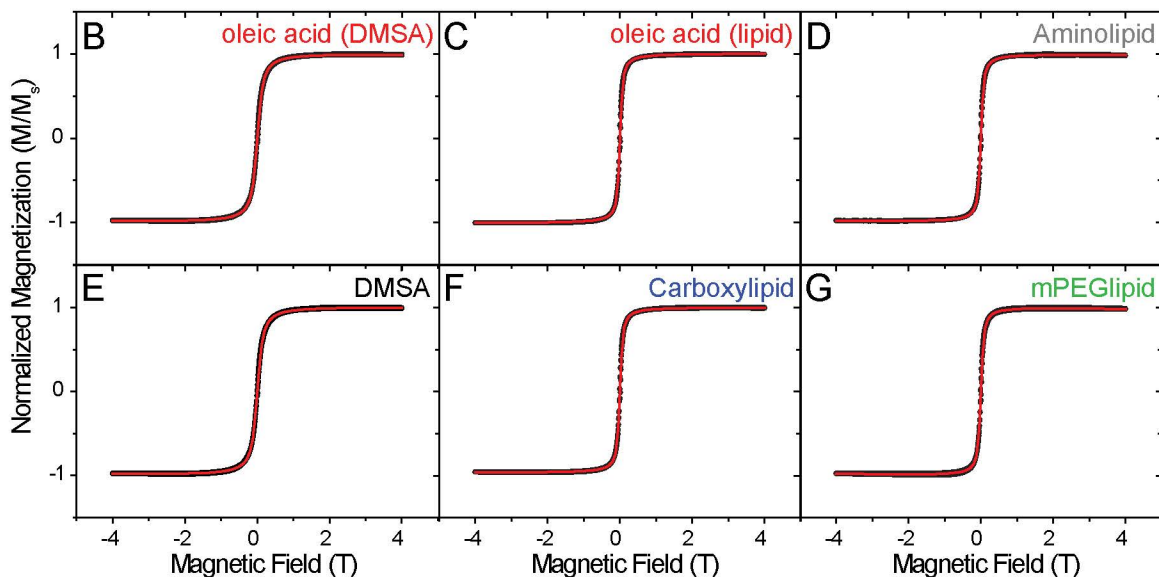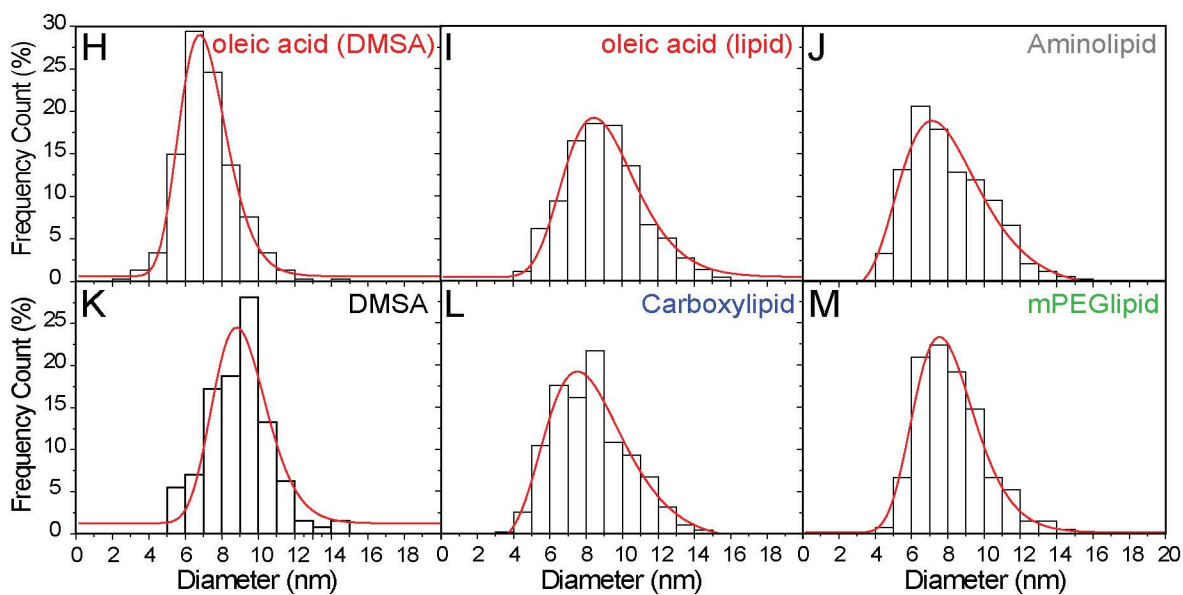

N

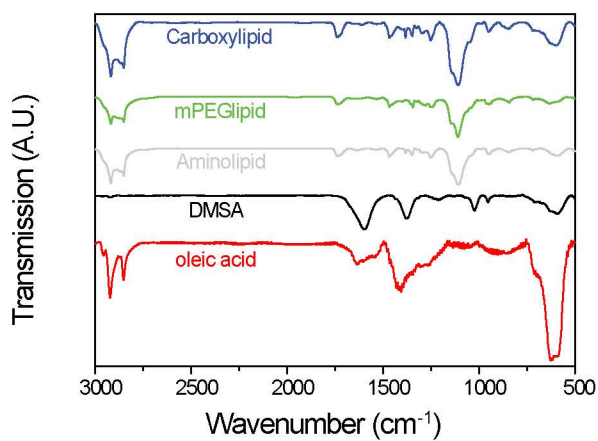

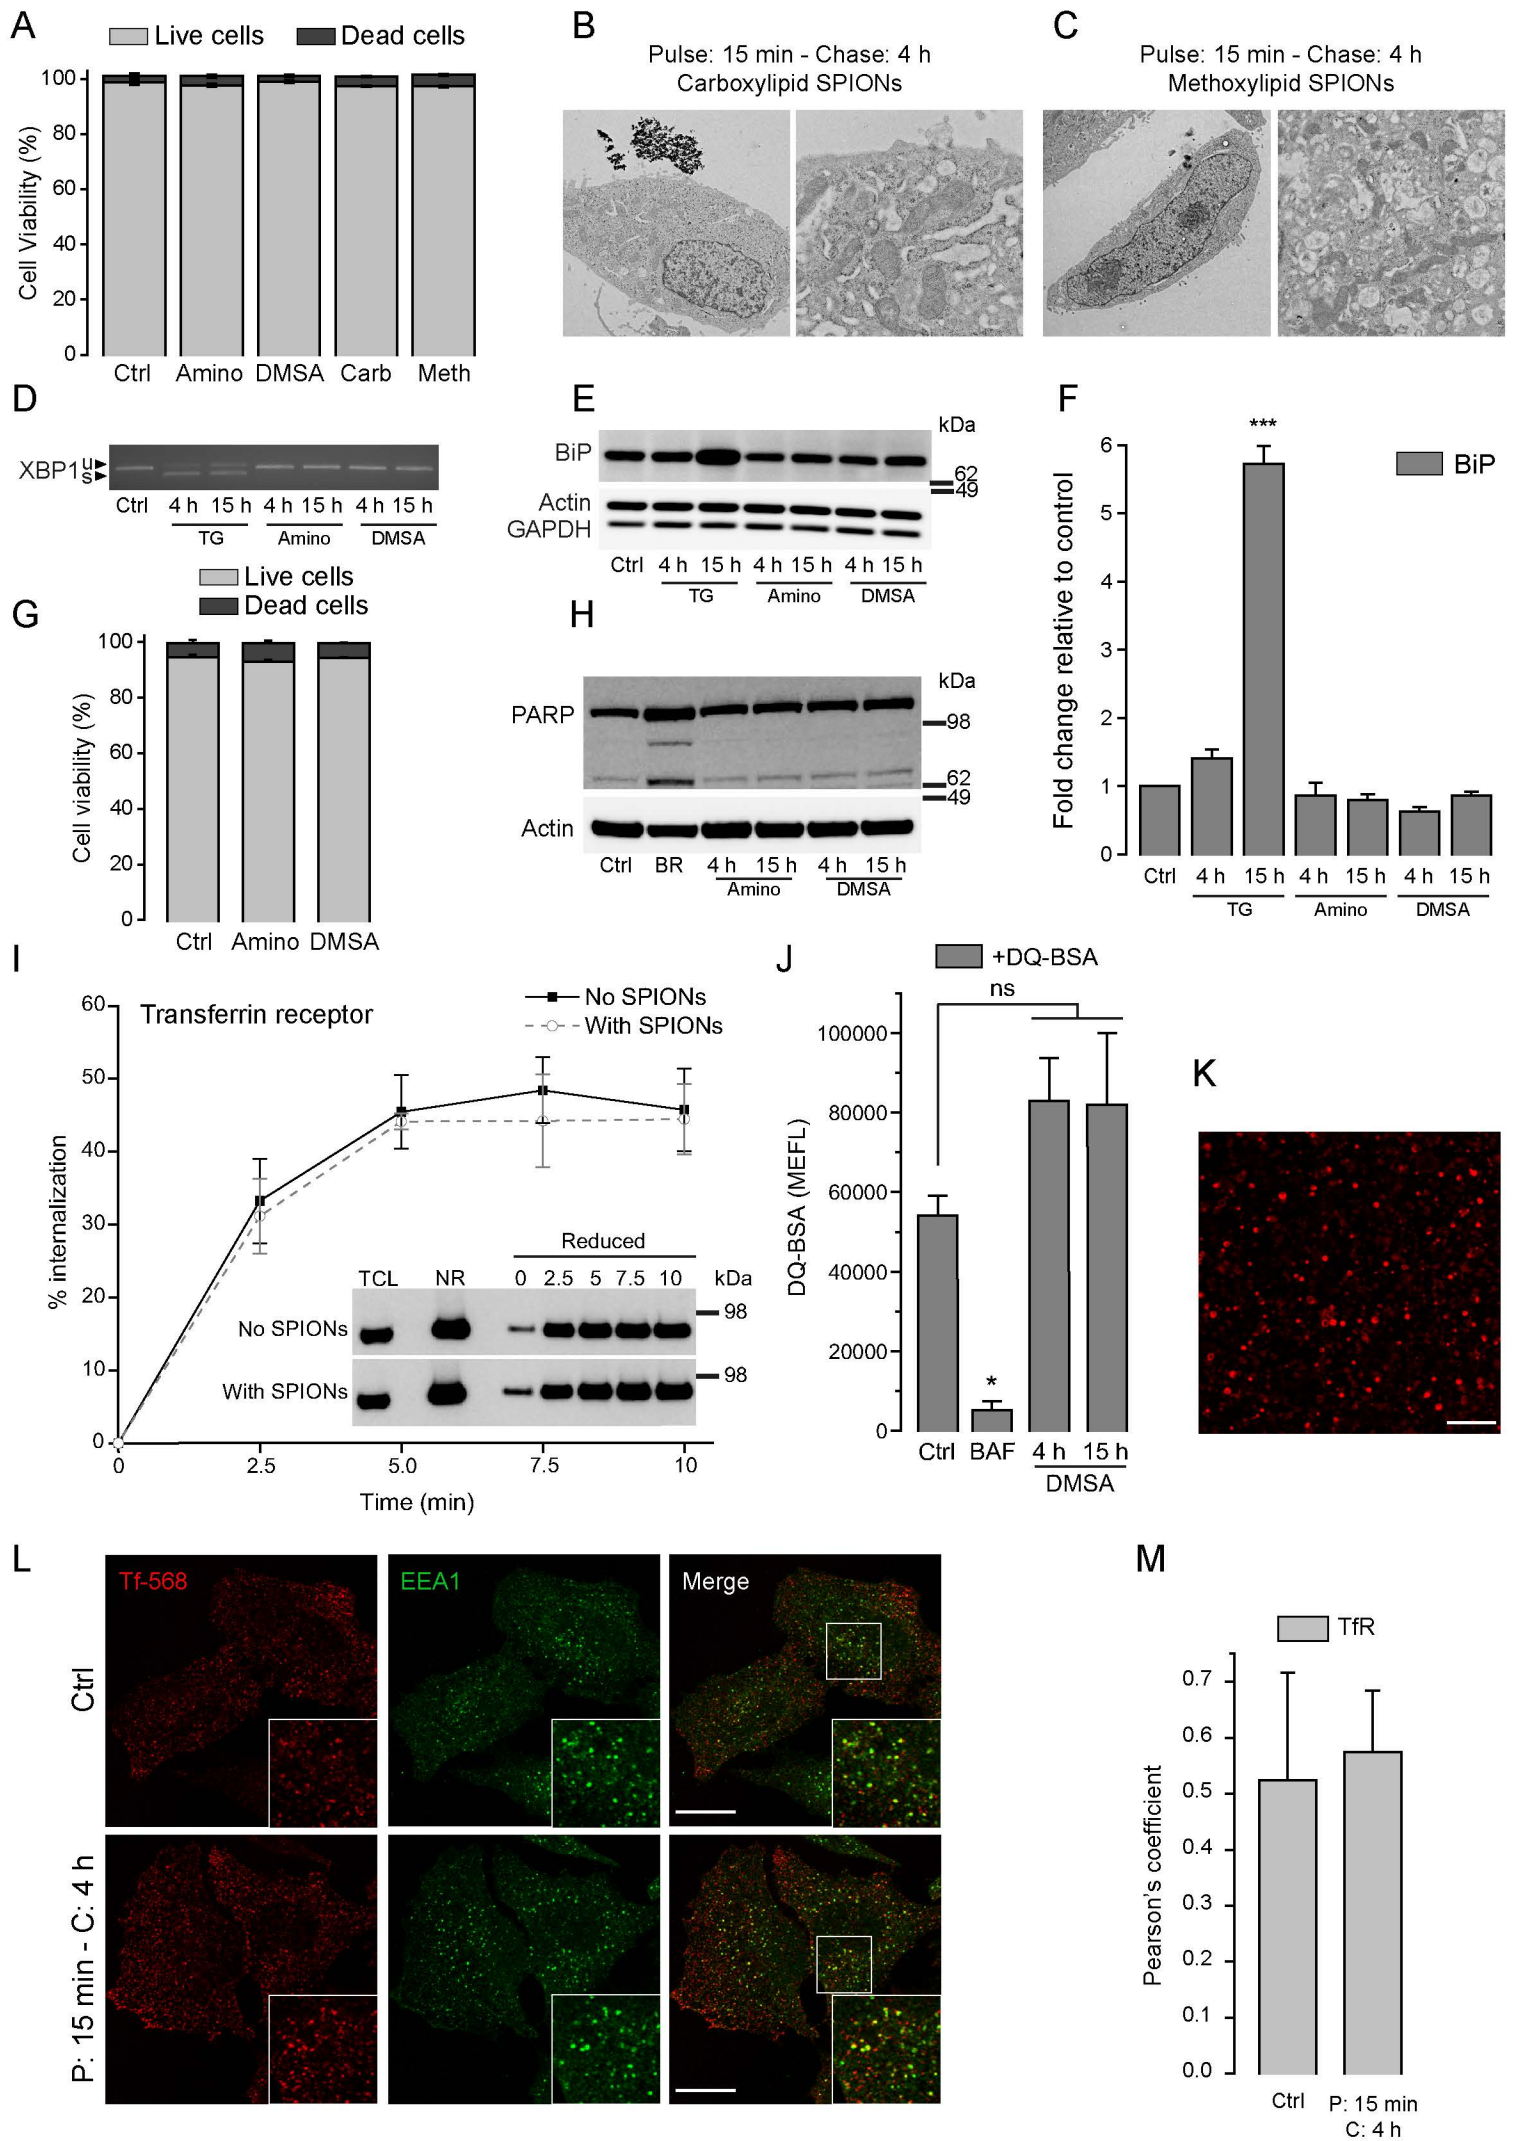



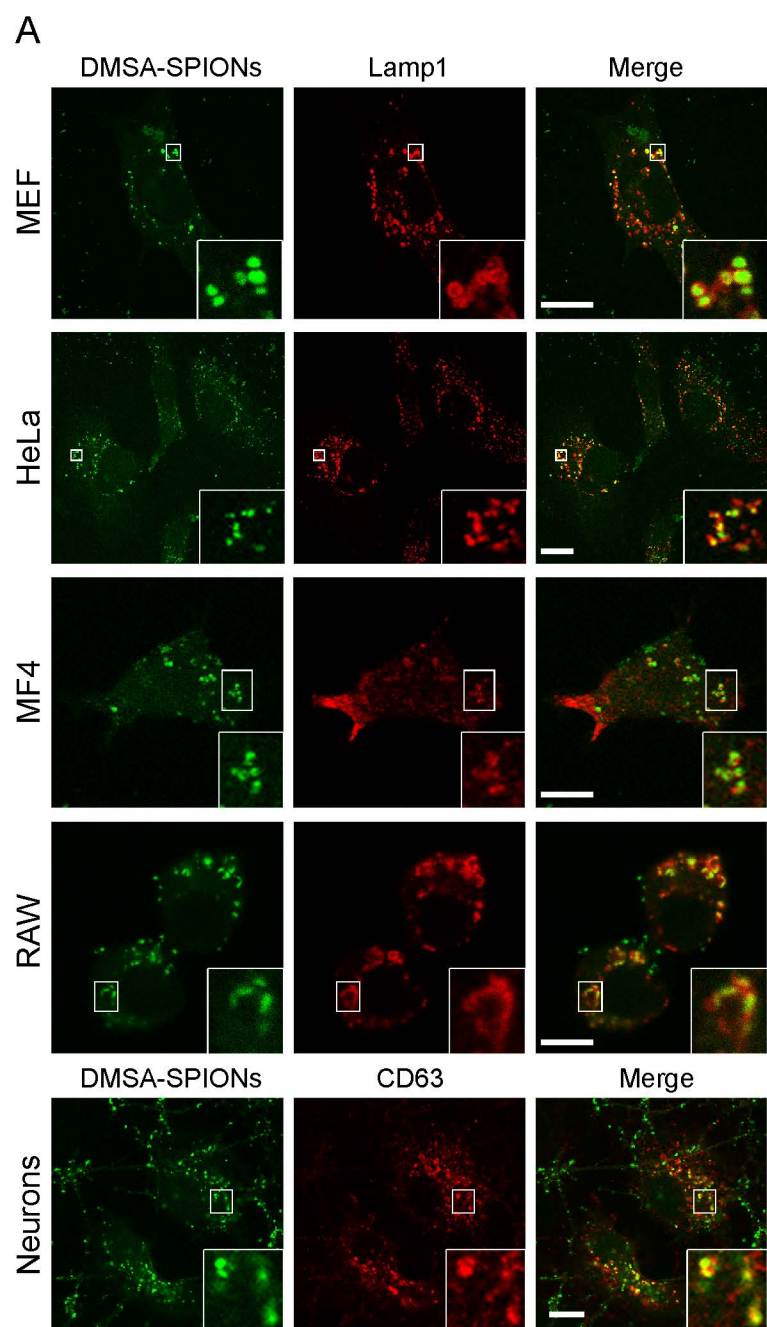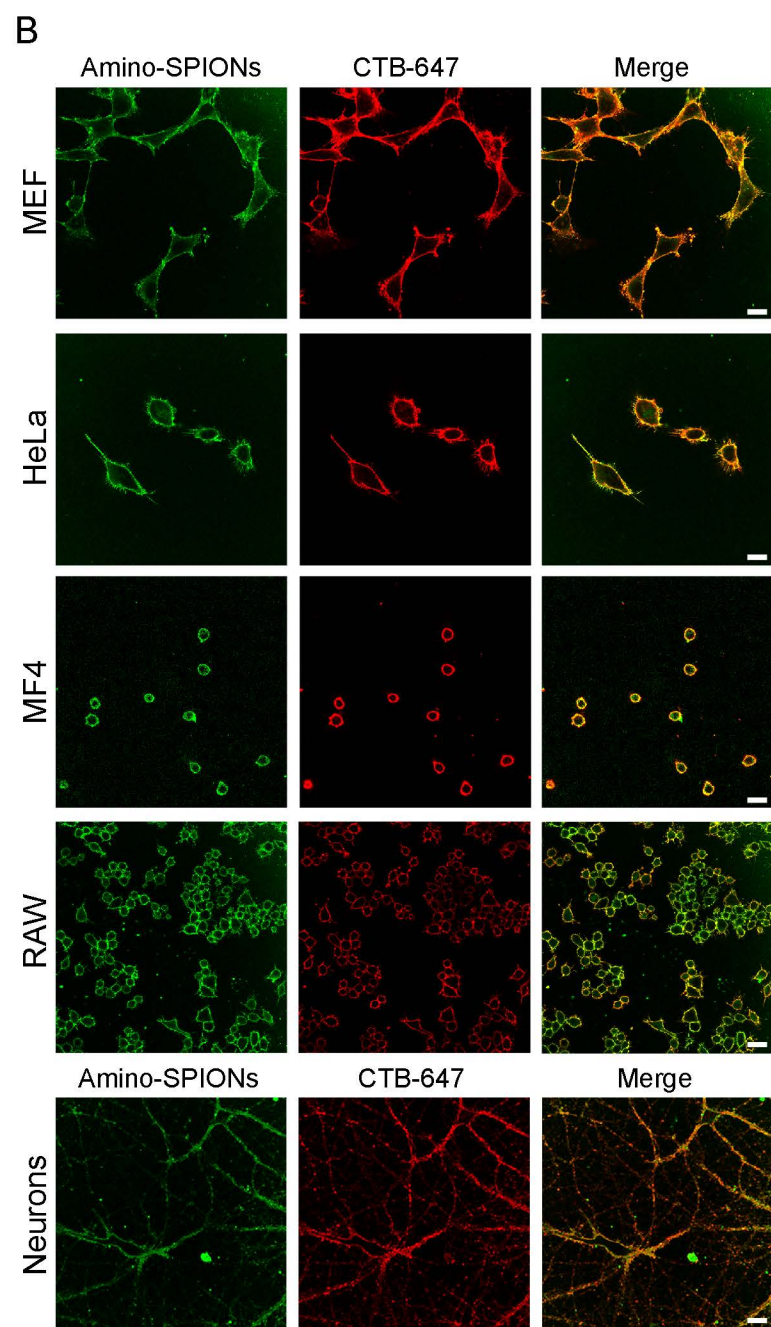

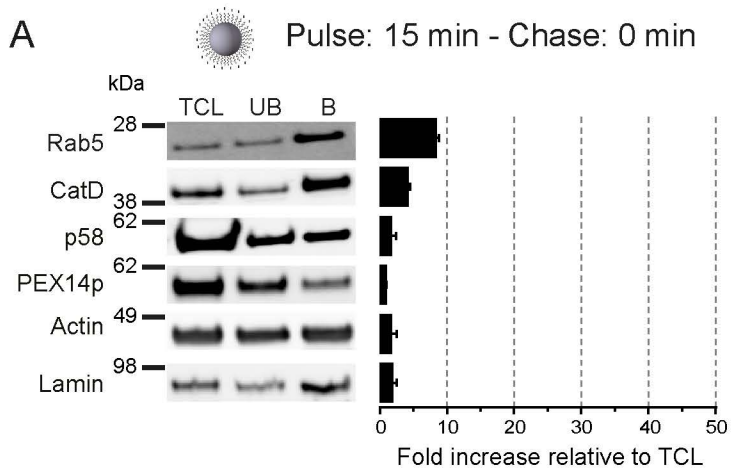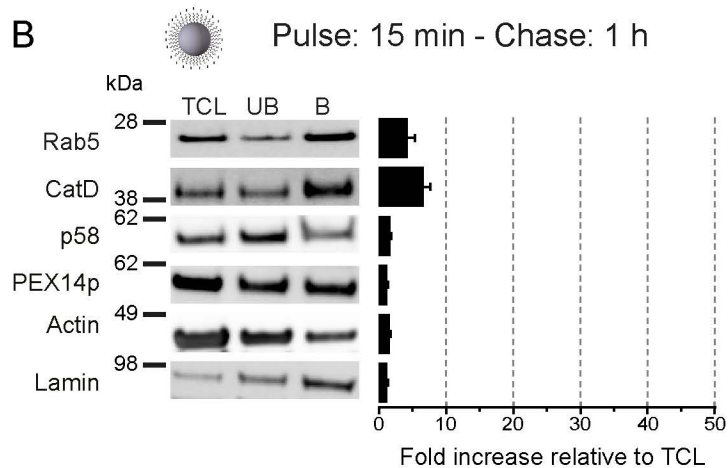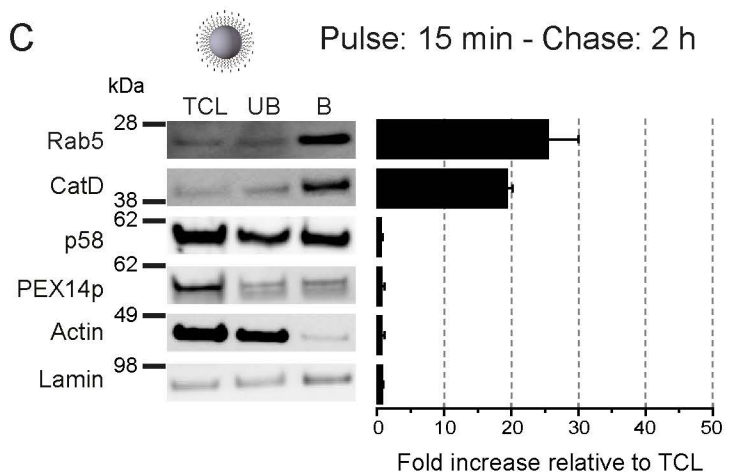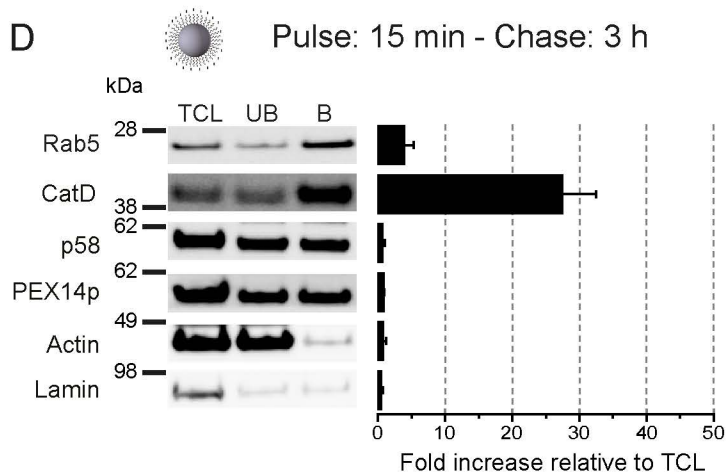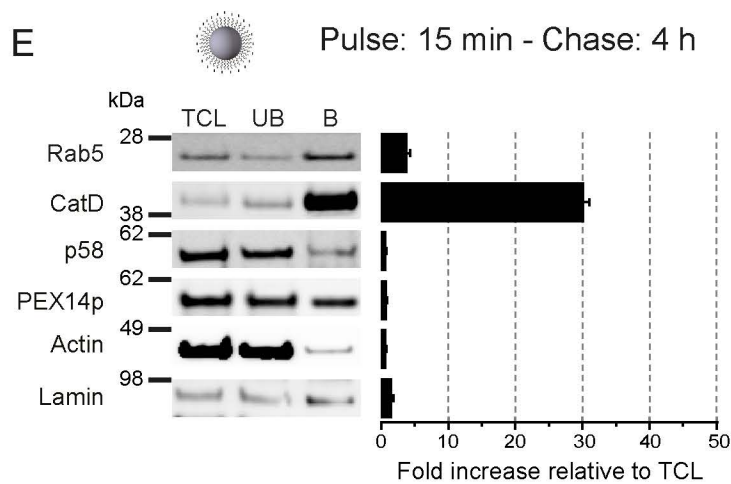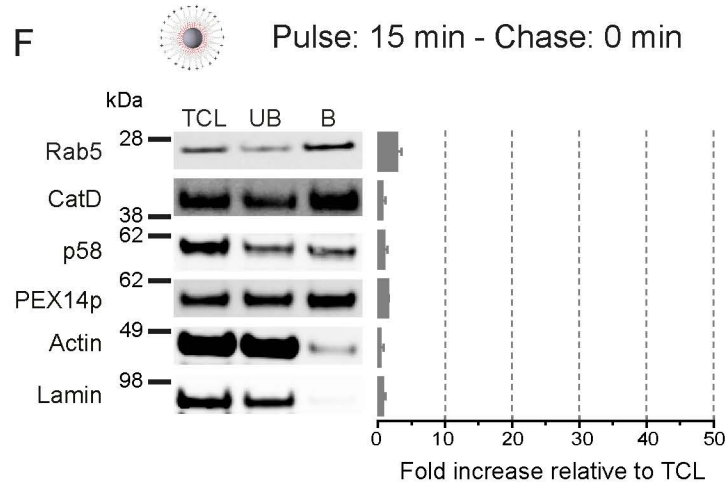

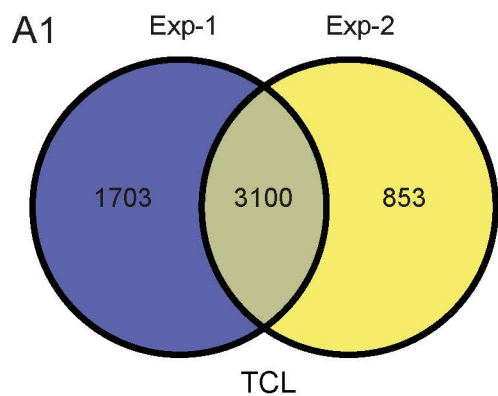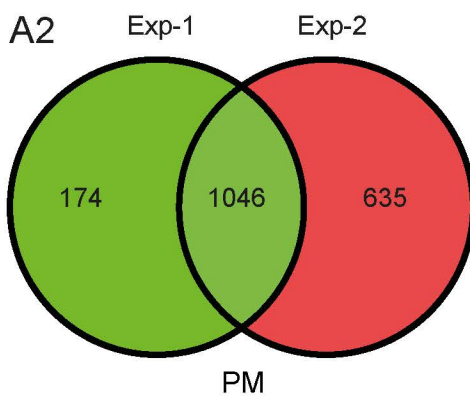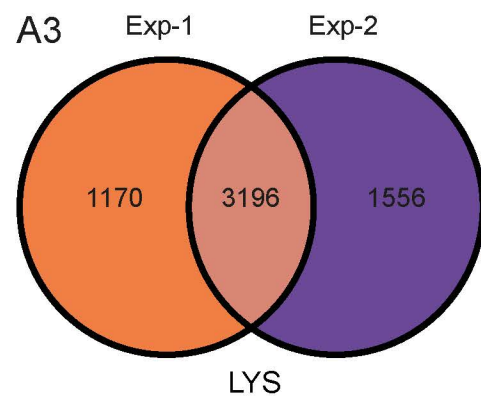

**B1**

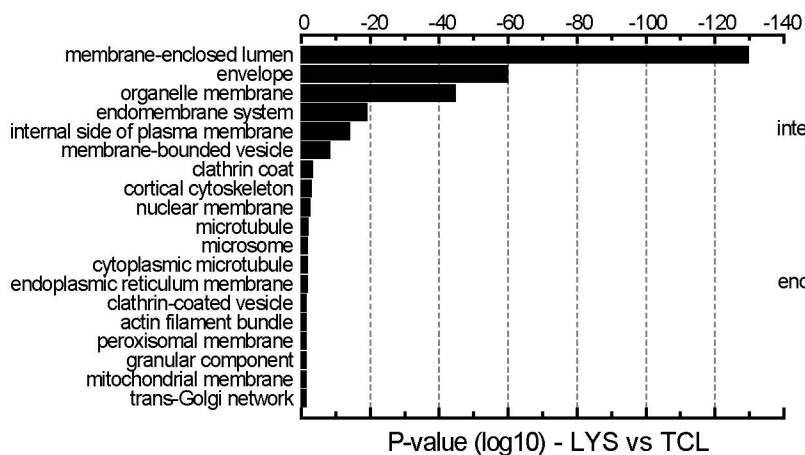

**B2**

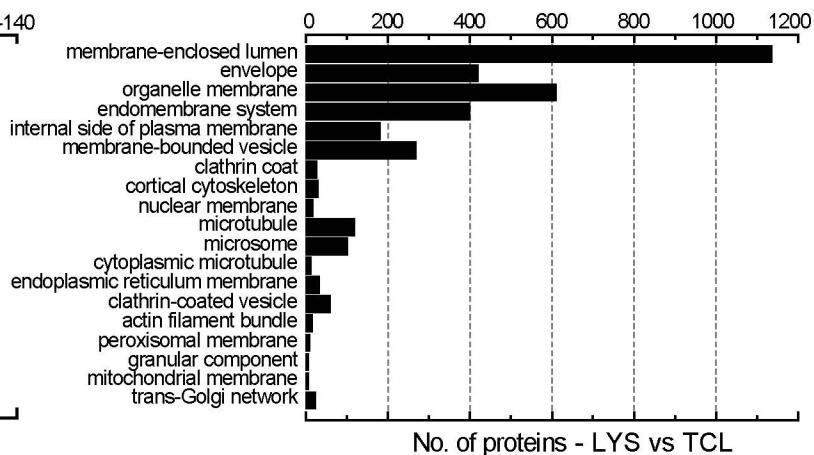

**C1**

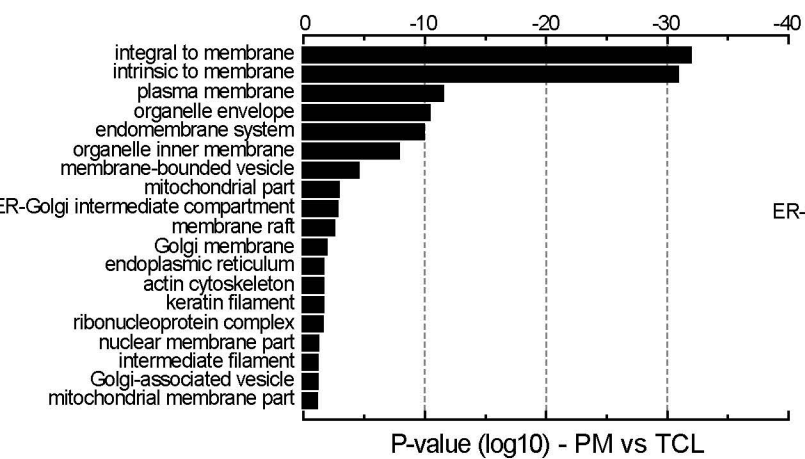

**C2**

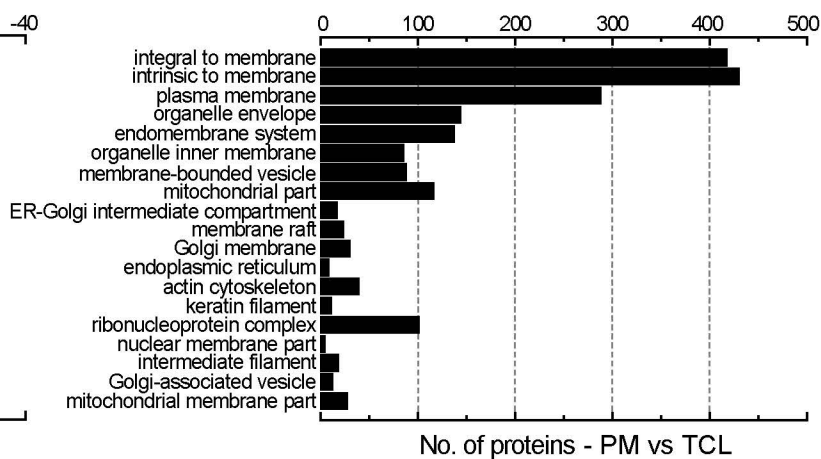

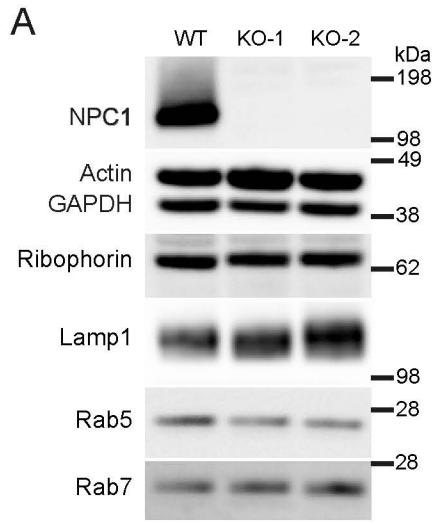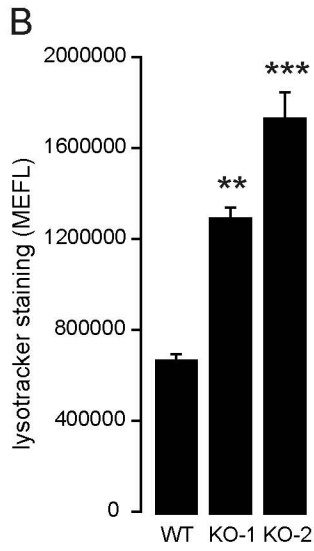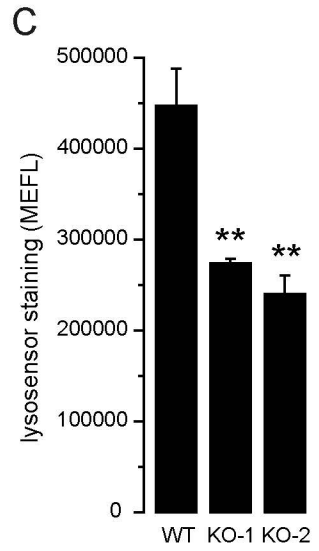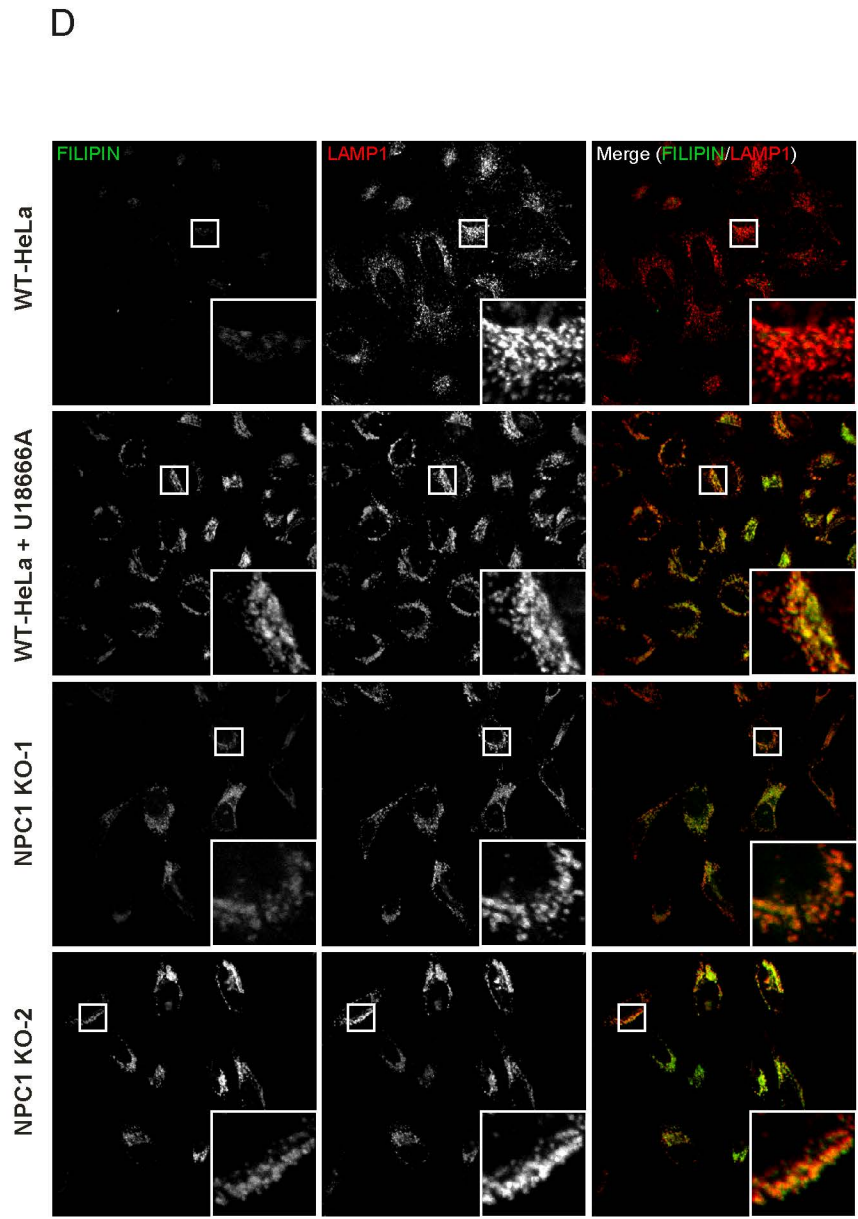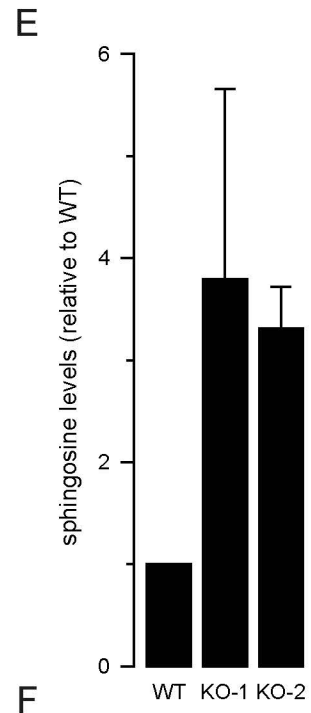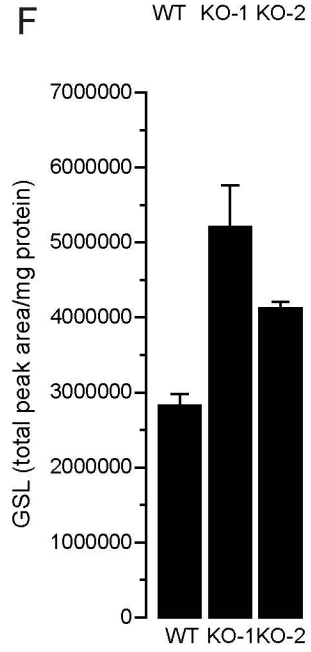

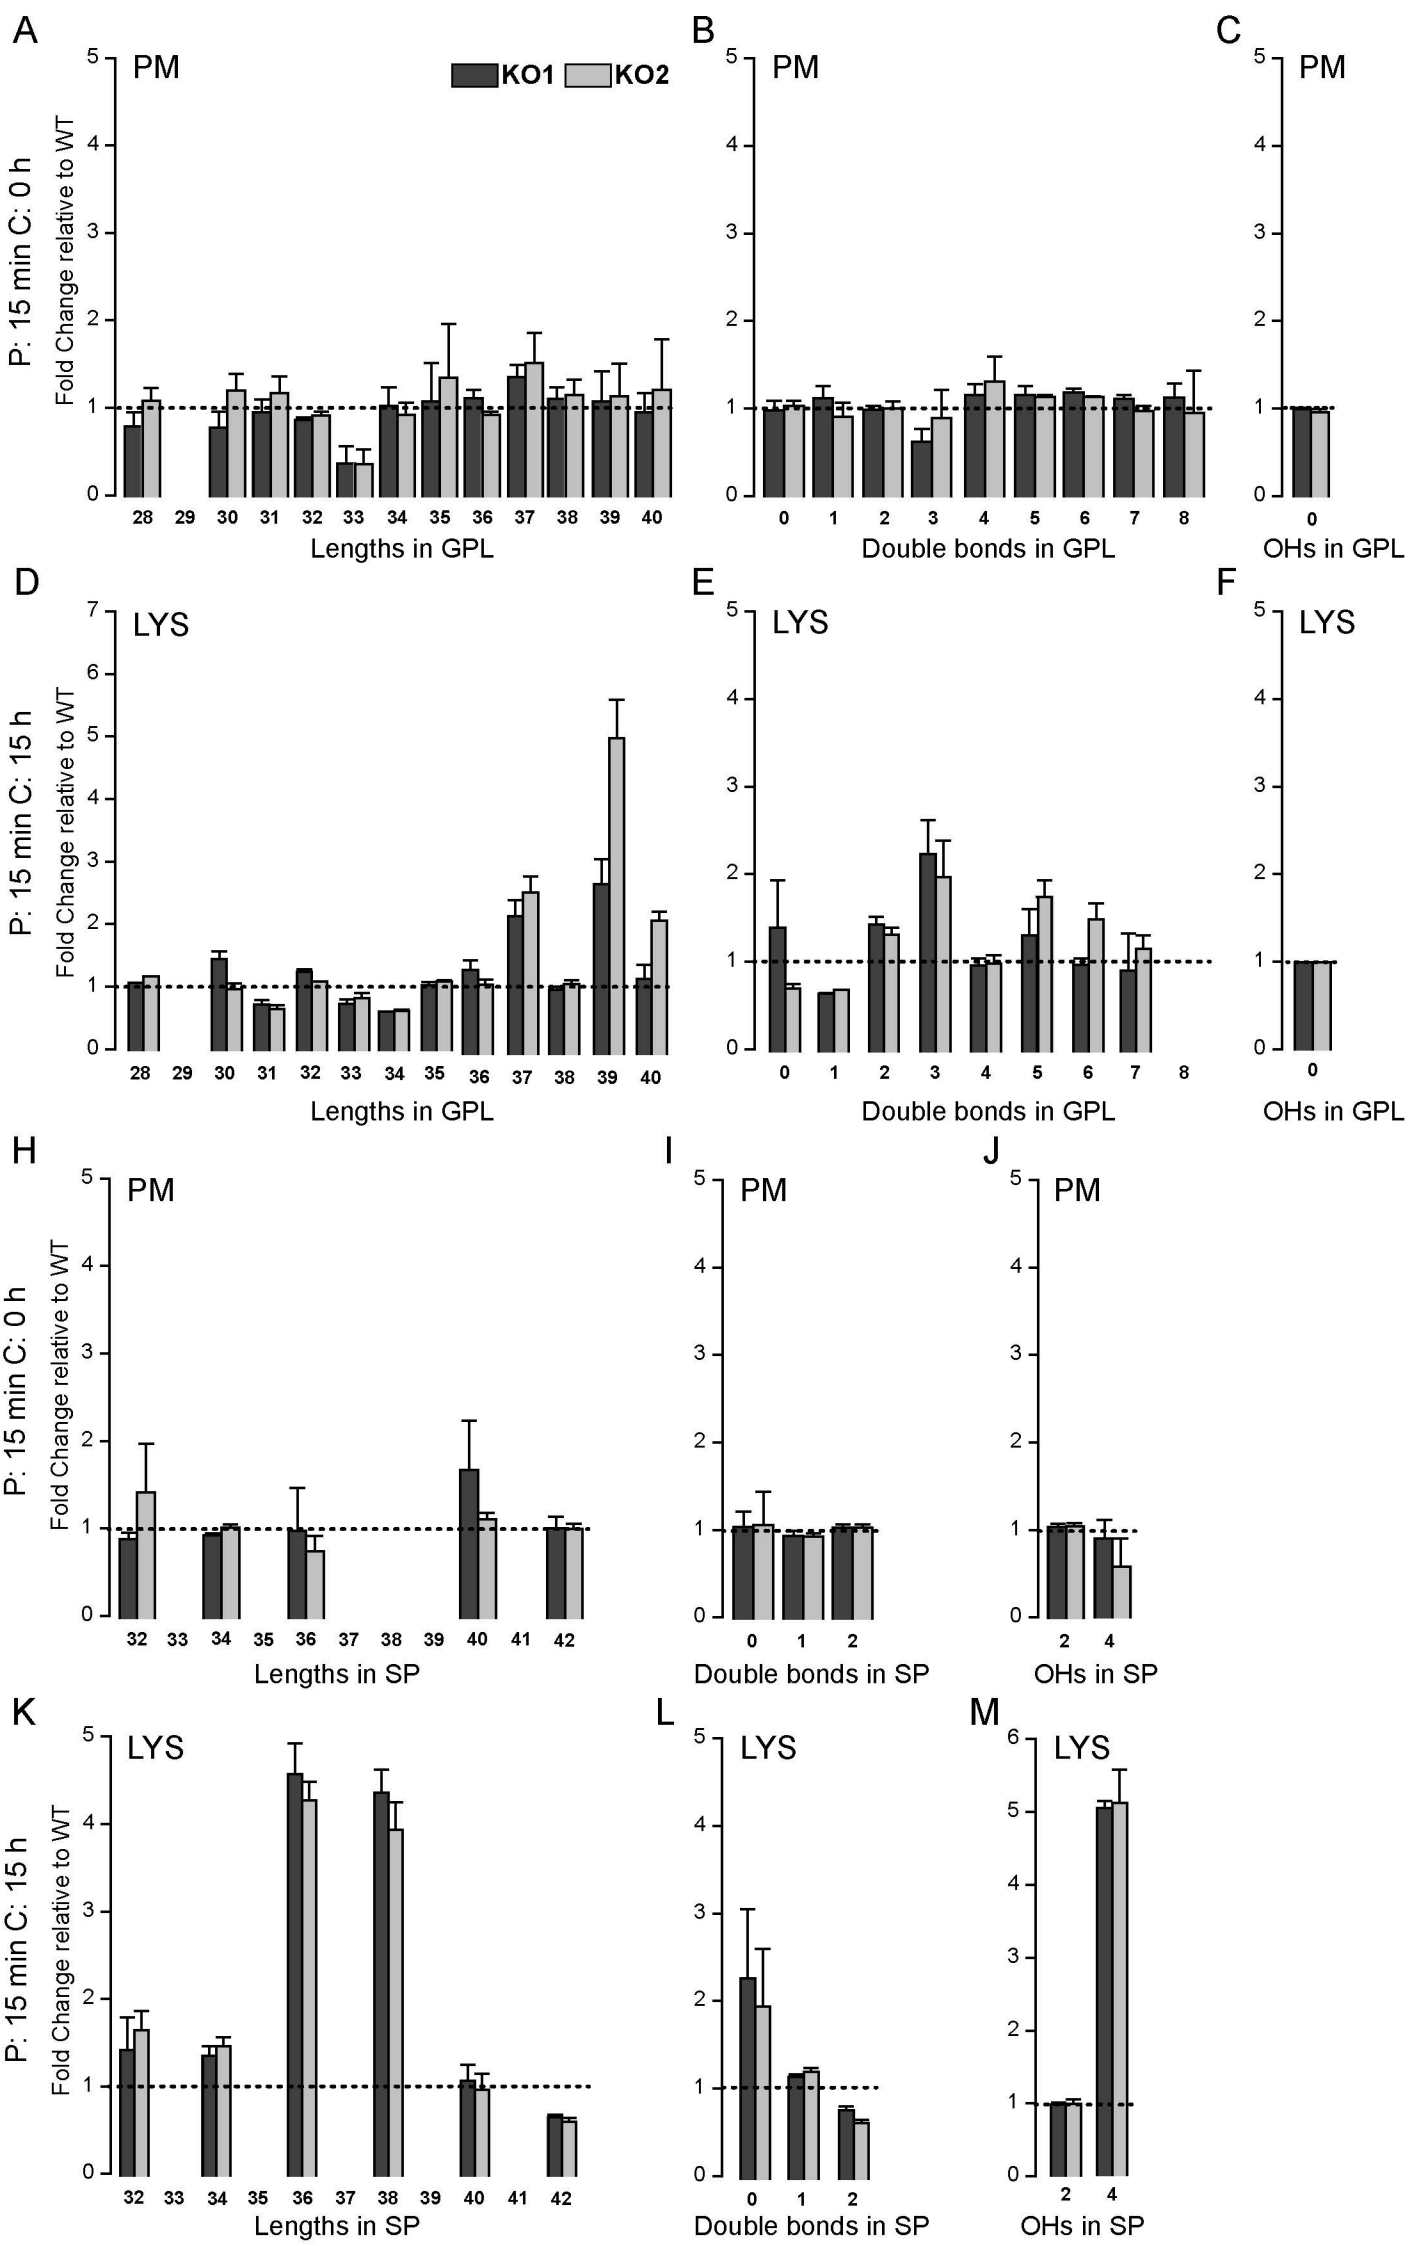

Supplement: srep41408-s1.pdf [file srep41408-s1.pdf]
